# Supplementary material for: A novel route to a chiral building block for the preparation of cyclopentenyl carbocyclic nucleosides. Synthesis and anticancer activity of enantiomeric neplanocins A
Source: PubMed Central journal article supplement (PMC9056547; doi:10.1039/d0ra06394k), 2020-08-27

## SUPPORTING INFORMATION

### **A novel route to the chiral building block for the preparation of cyclopentenyl carbocyclic nucleosides. Synthesis and anticancer activity of enantiomeric neplanocins A**

**Beata Łukasik,<sup>a</sup> Maciej Mikina,<sup>a</sup> Marian Mikołajczyk,<sup>a</sup> Róża Pawłowska,<sup>\*b</sup> and Remigiusz Żurawiński<sup>\*a</sup>**

<sup>a</sup> *Division of Organic Chemistry, Centre of Molecular and Macromolecular Studies, Polish Academy of Sciences, Sienkiewicza 112, 90-363 Łódź, Poland, Fax: (+48)-426803260, E-mail: remzur@cbmm.lodz.pl*

<sup>b</sup> *Division of Bioorganic Chemistry, Centre of Molecular and Macromolecular Studies, Polish Academy of Sciences, Sienkiewicza 112, 90-363 Łódź, Poland*

### **Table of Contents**

**<sup>1</sup>H and <sup>13</sup>C spectra of compounds **3c**, **13-17** and neplanocin A (**NPA**).**

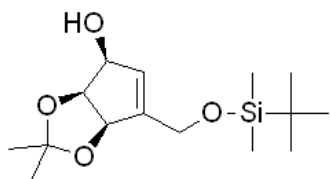

**3c**

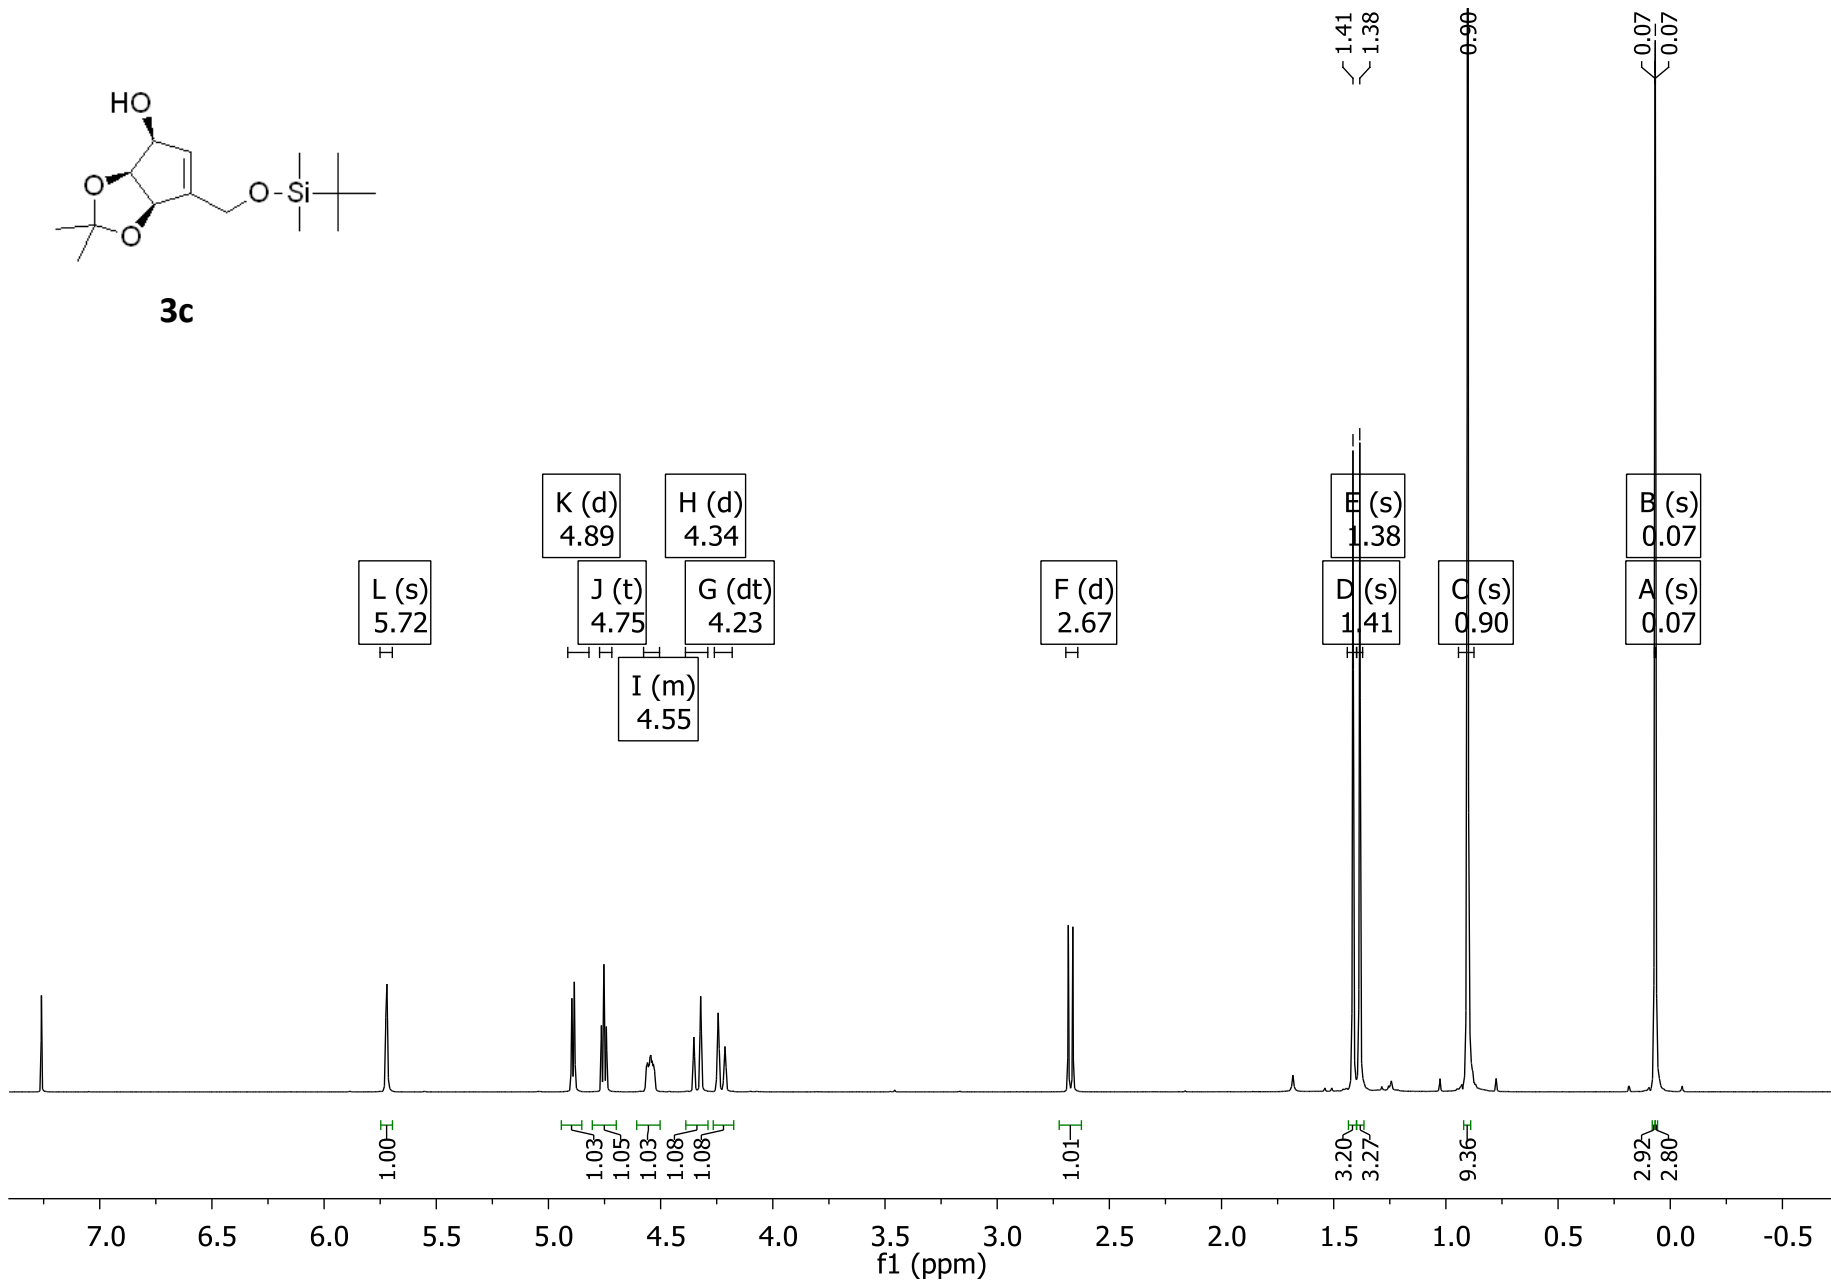

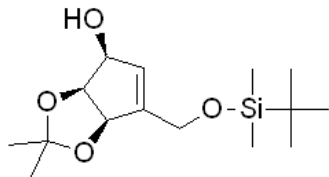

3c

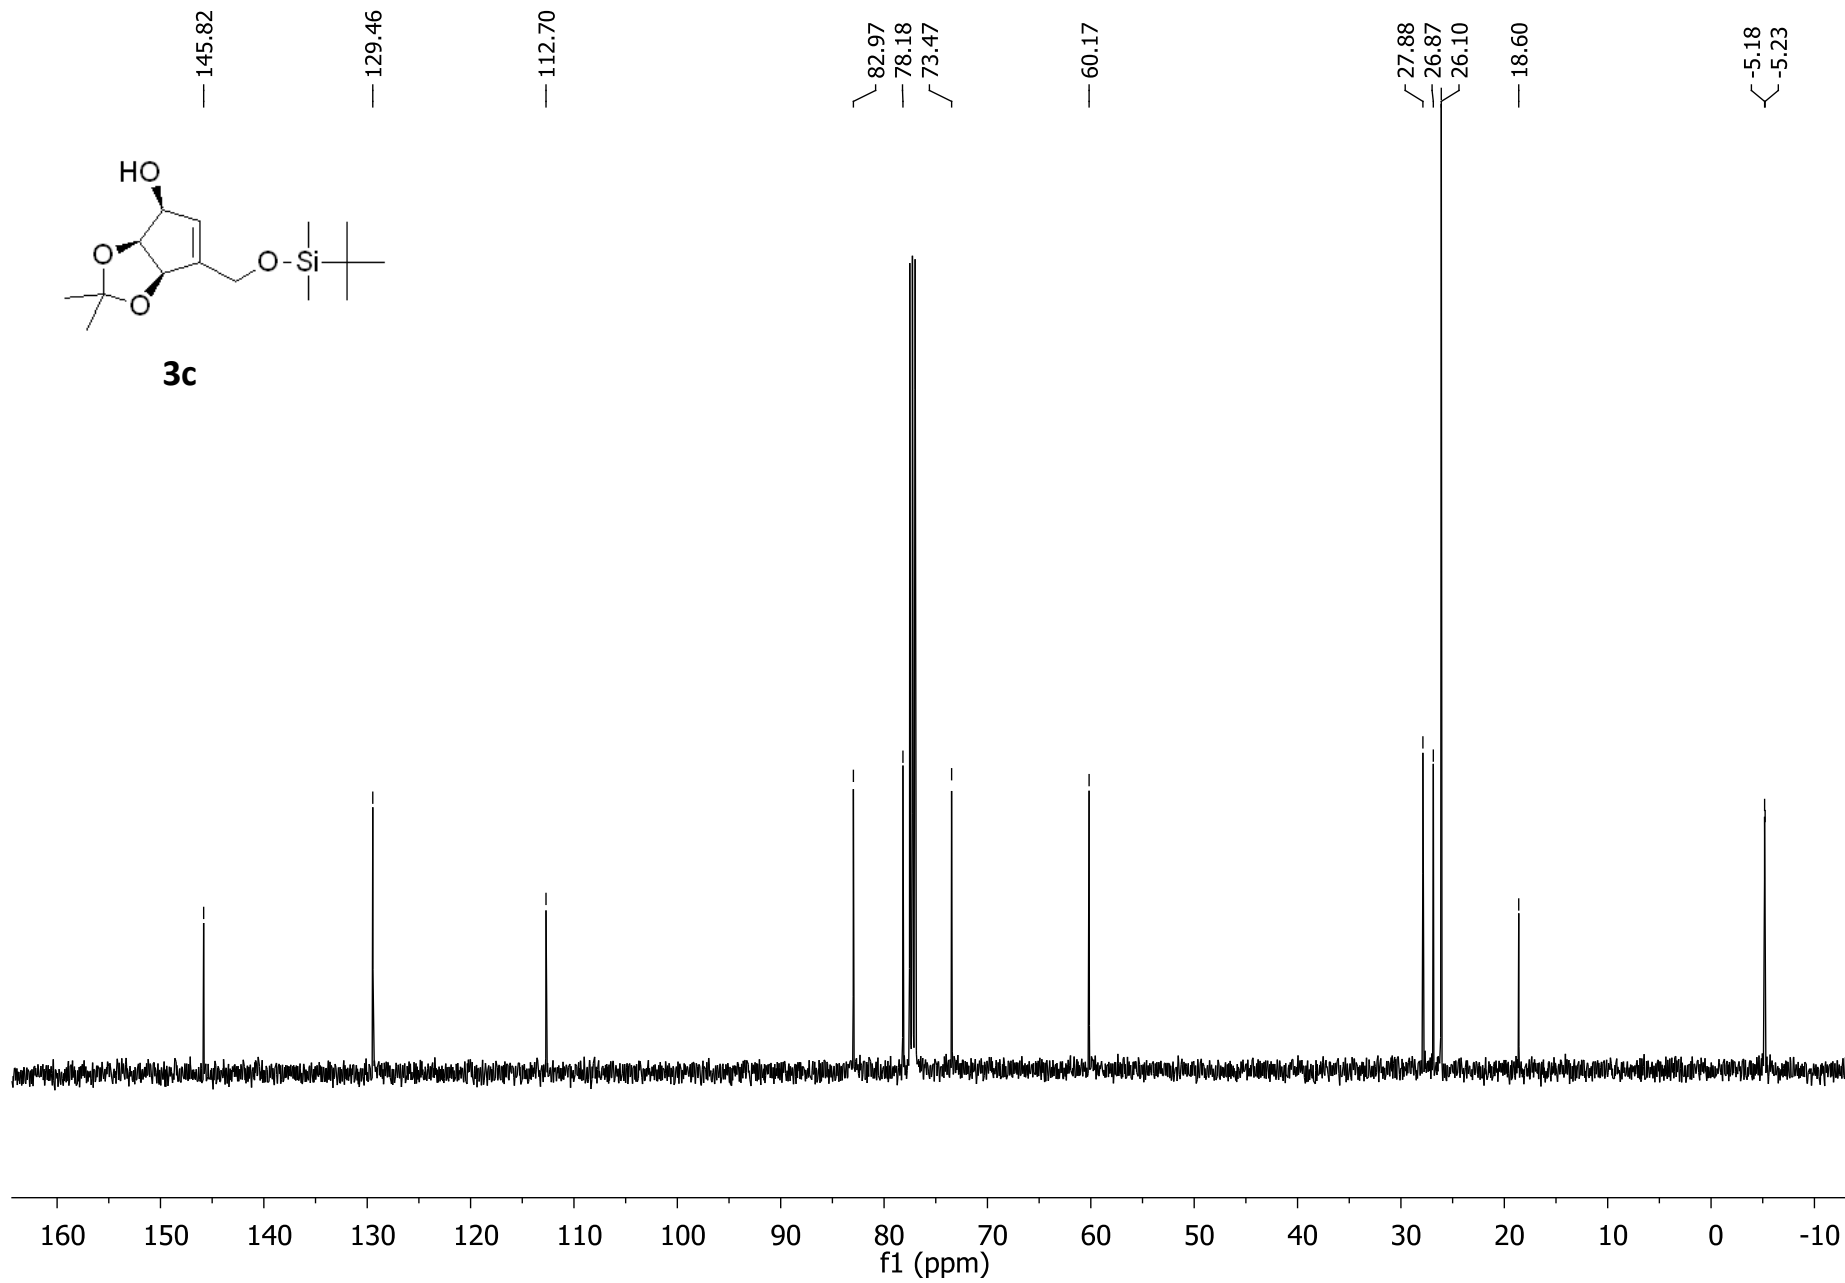

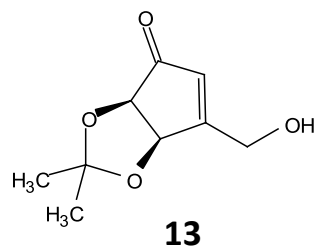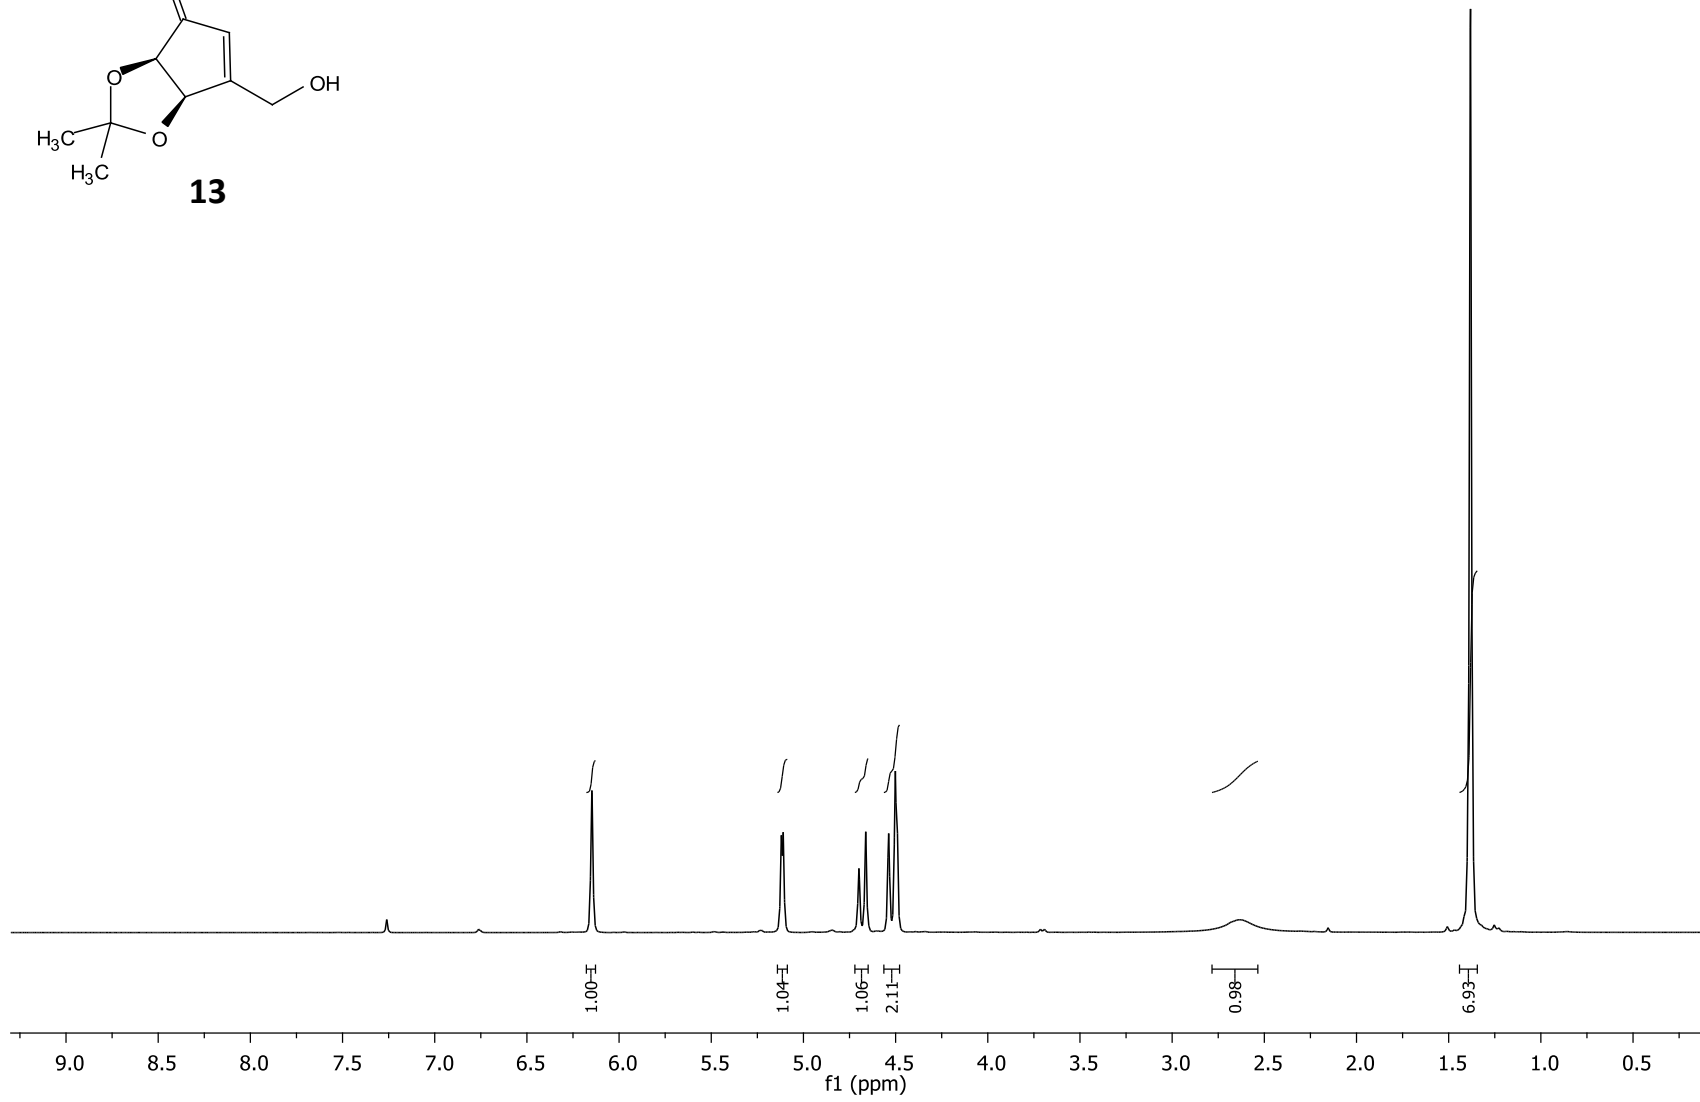

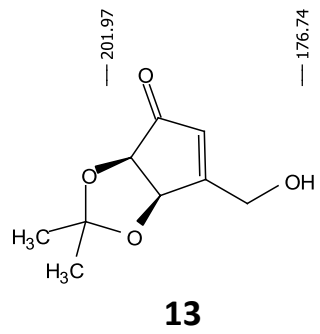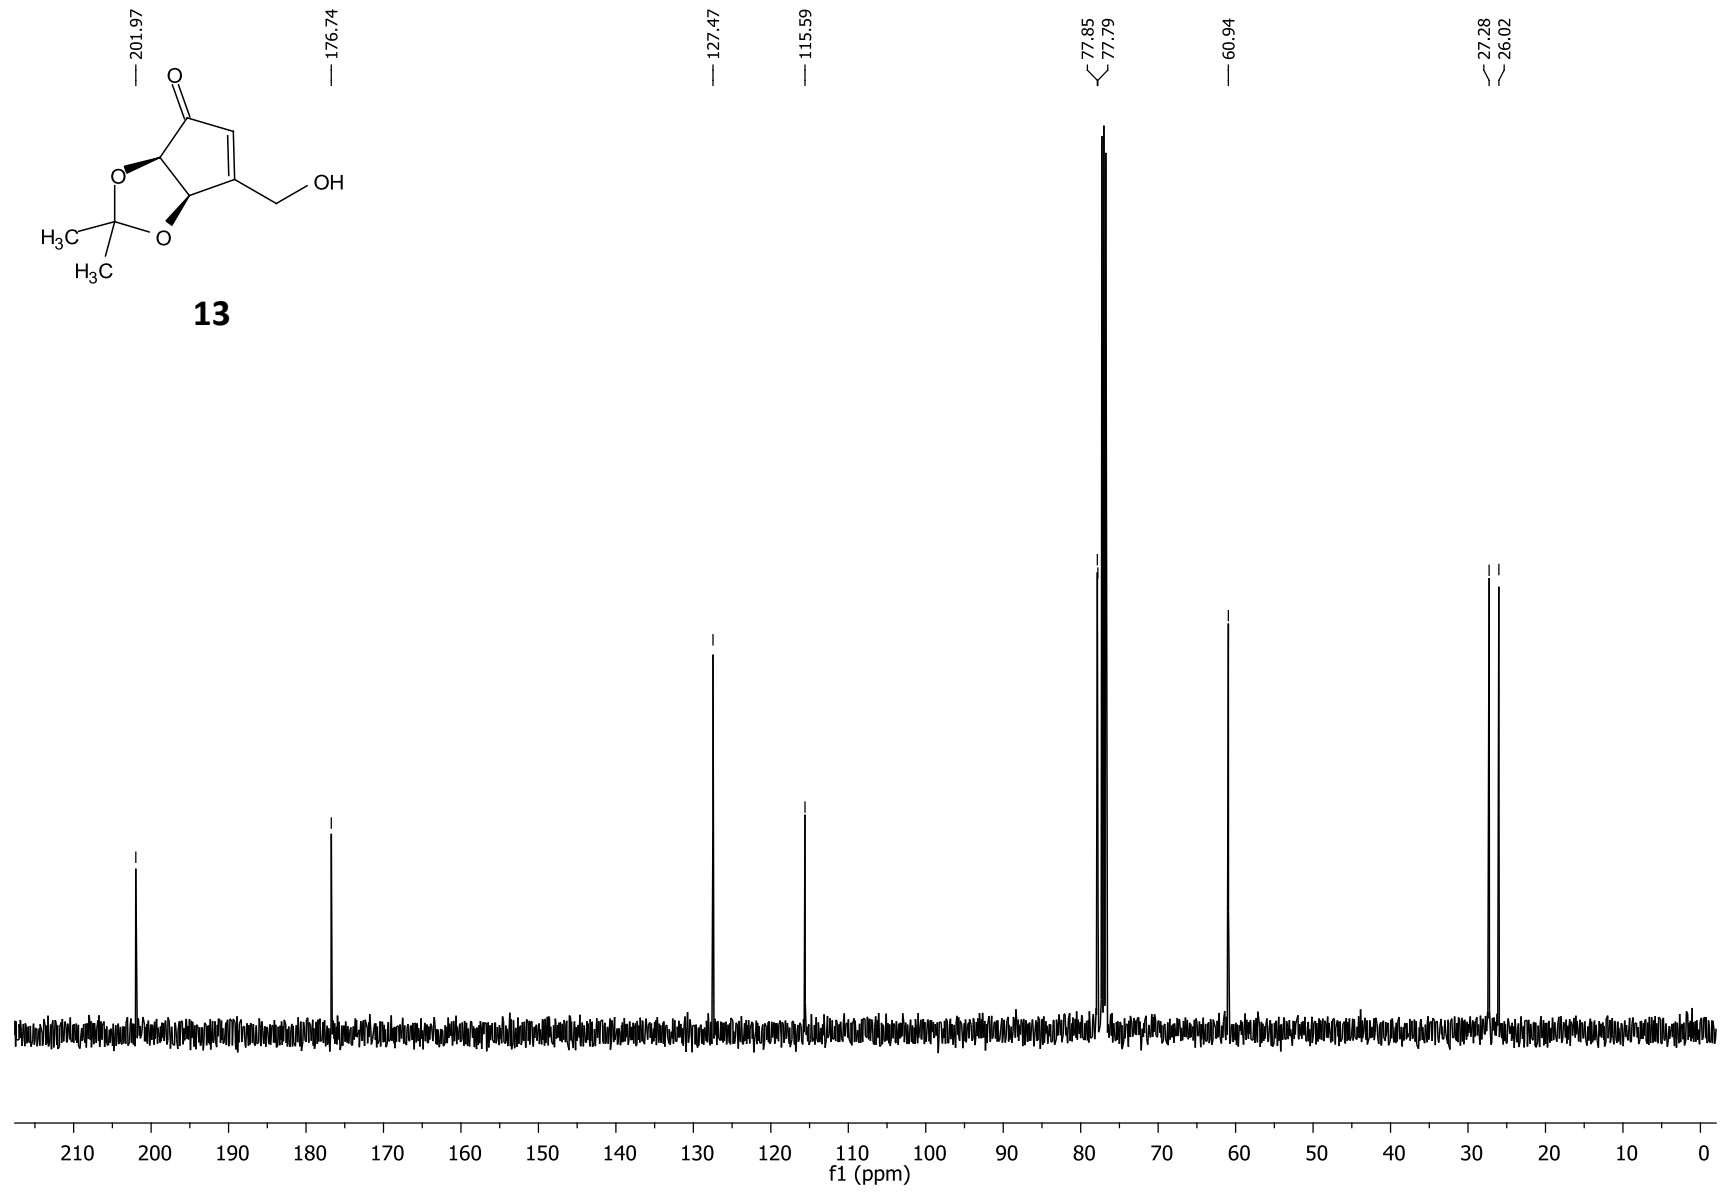

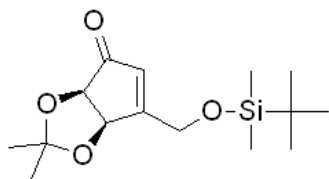

**14**

— 6.16

5.06  
5.05  
4.68  
4.65  
4.52  
4.51  
4.49  
4.46

— 1.40

— 0.92

— 0.10

E (s)  
6.16

D (d)  
5.06

F (d)  
4.66

G (d)  
4.51

H (d)  
4.47

C (s)  
1.40

B (s)  
0.92

A (s)  
0.10

1.00H

1.08H

1.13H

1.01H

1.08H

6.41H

9.56H

6.16H

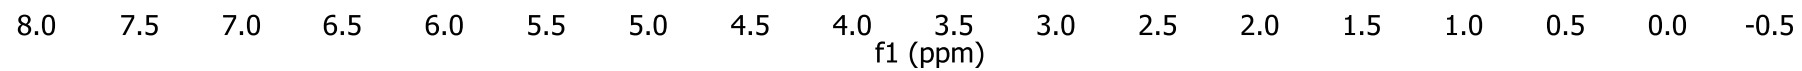

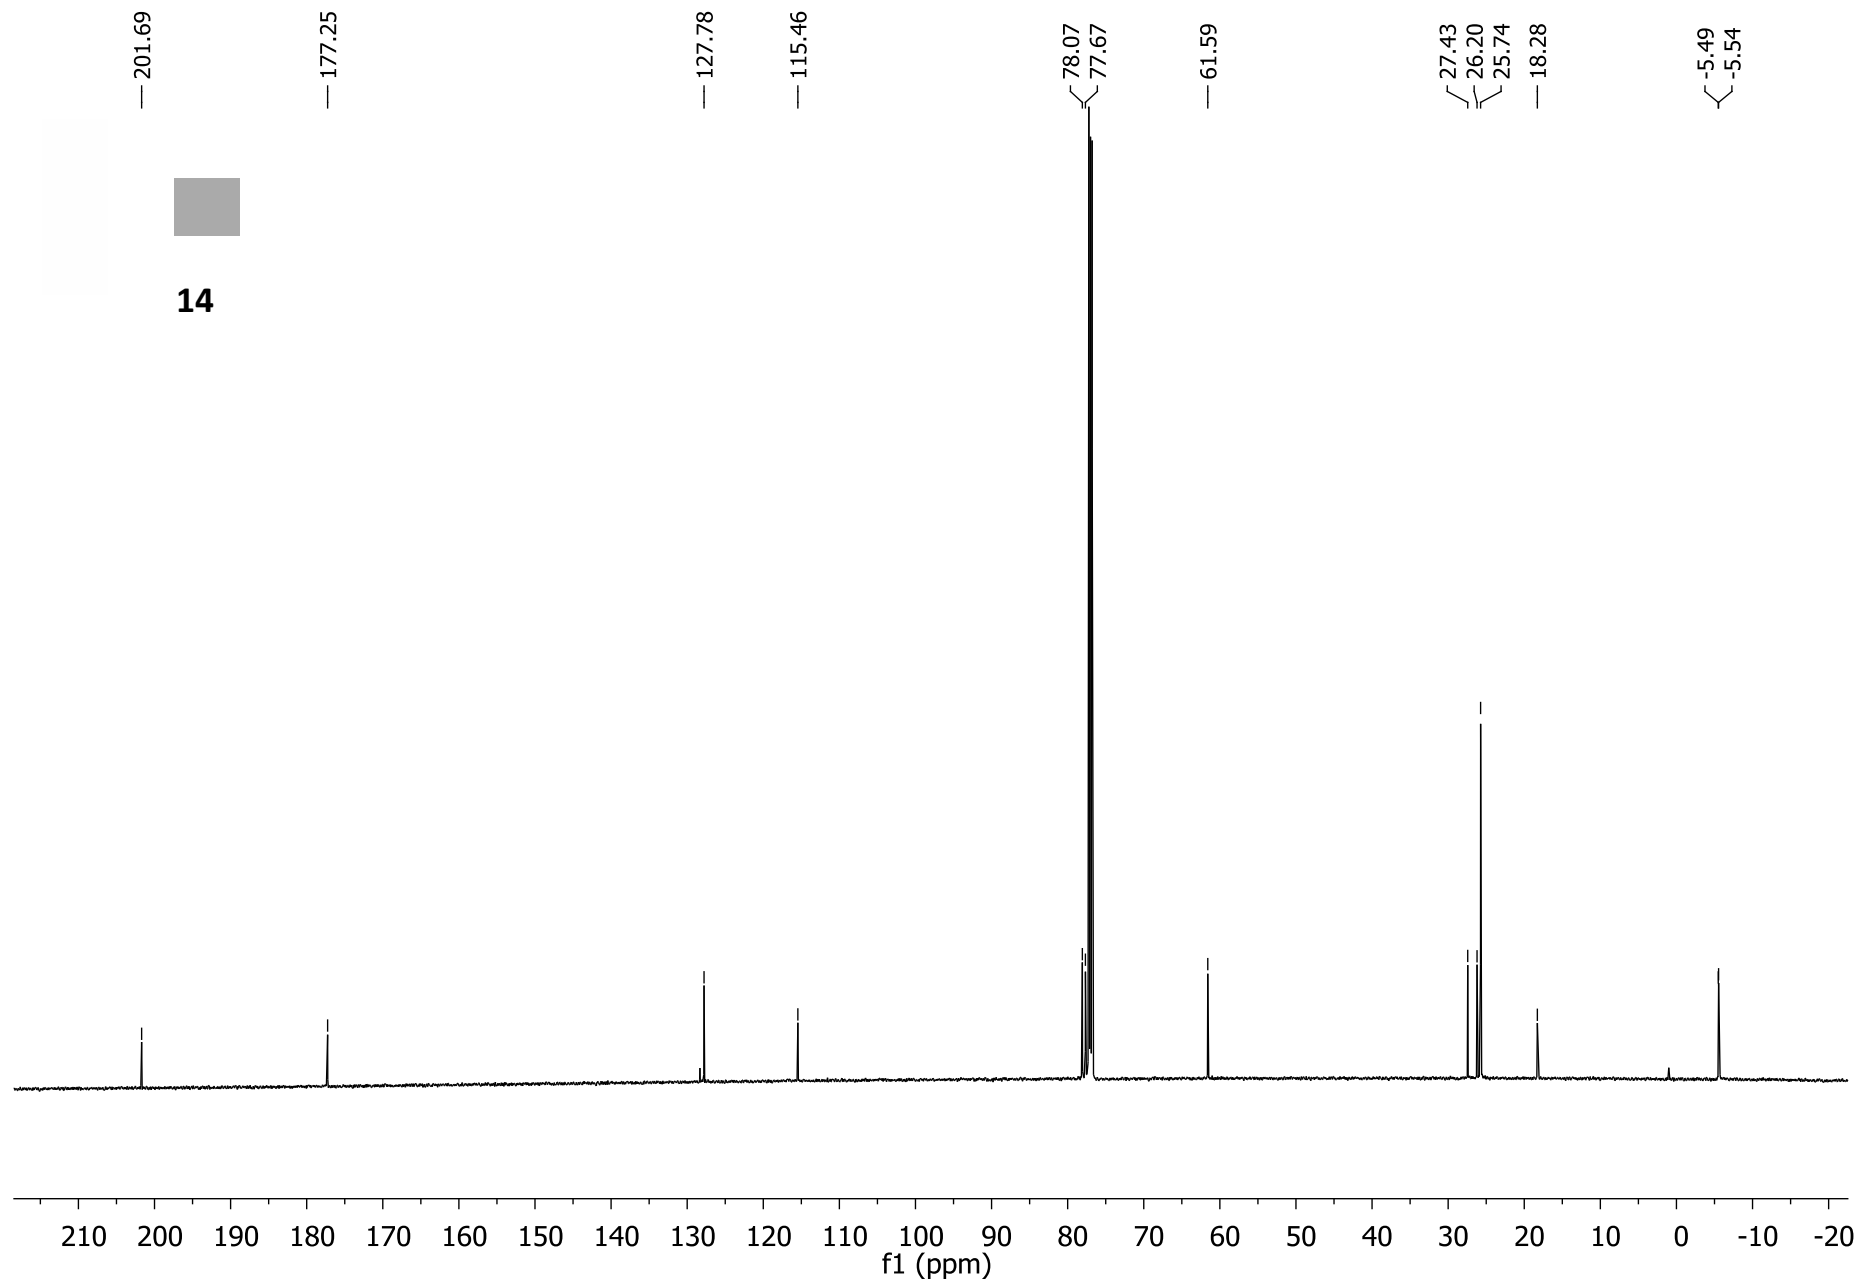

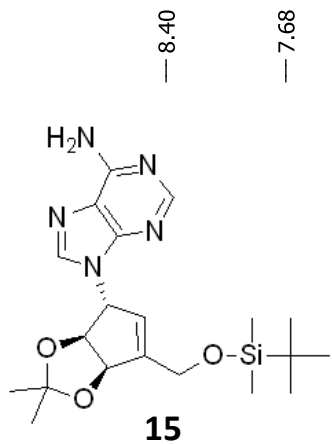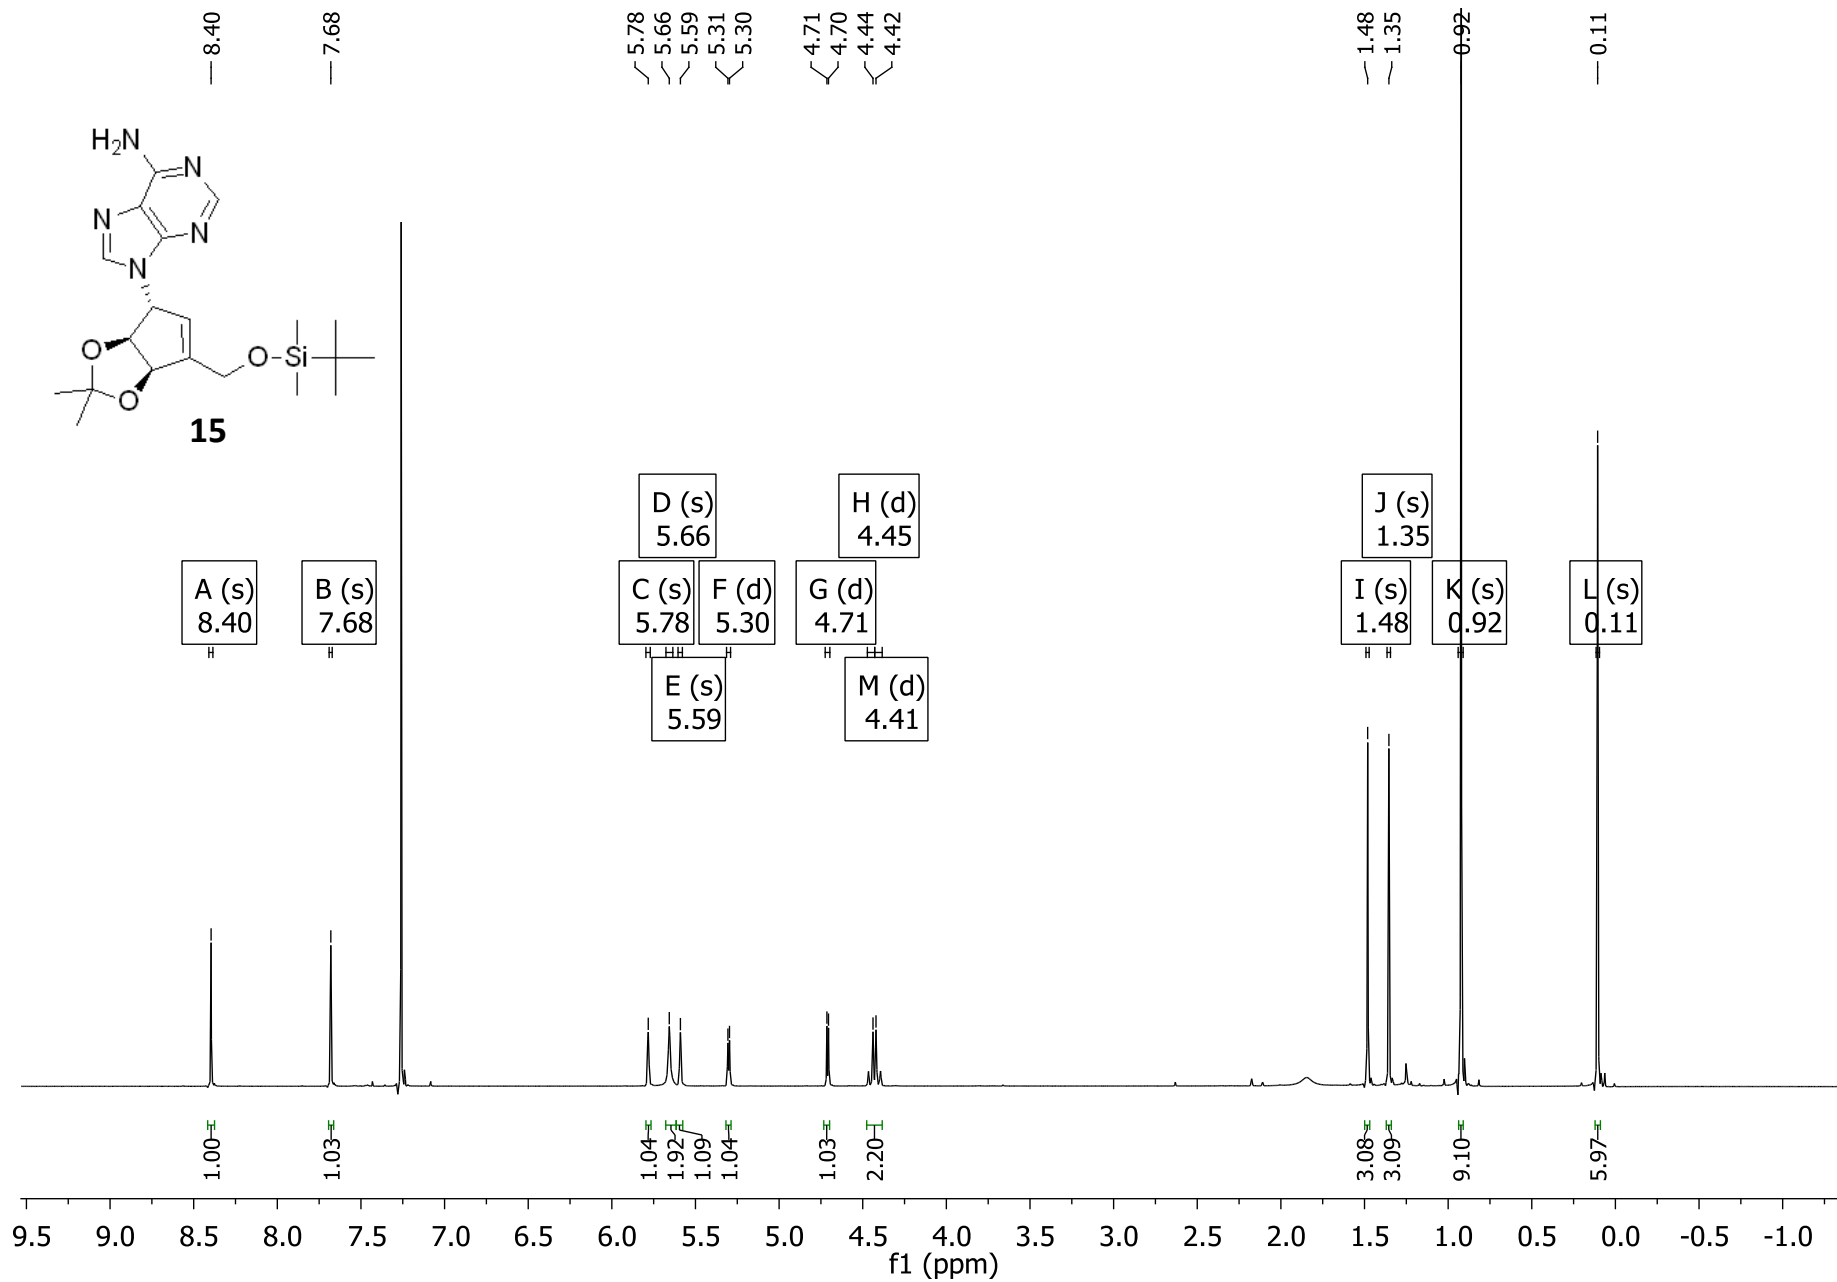



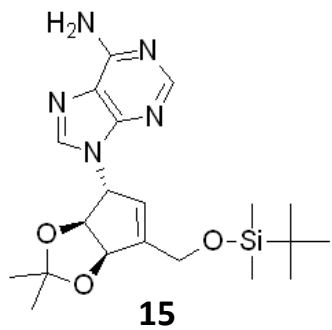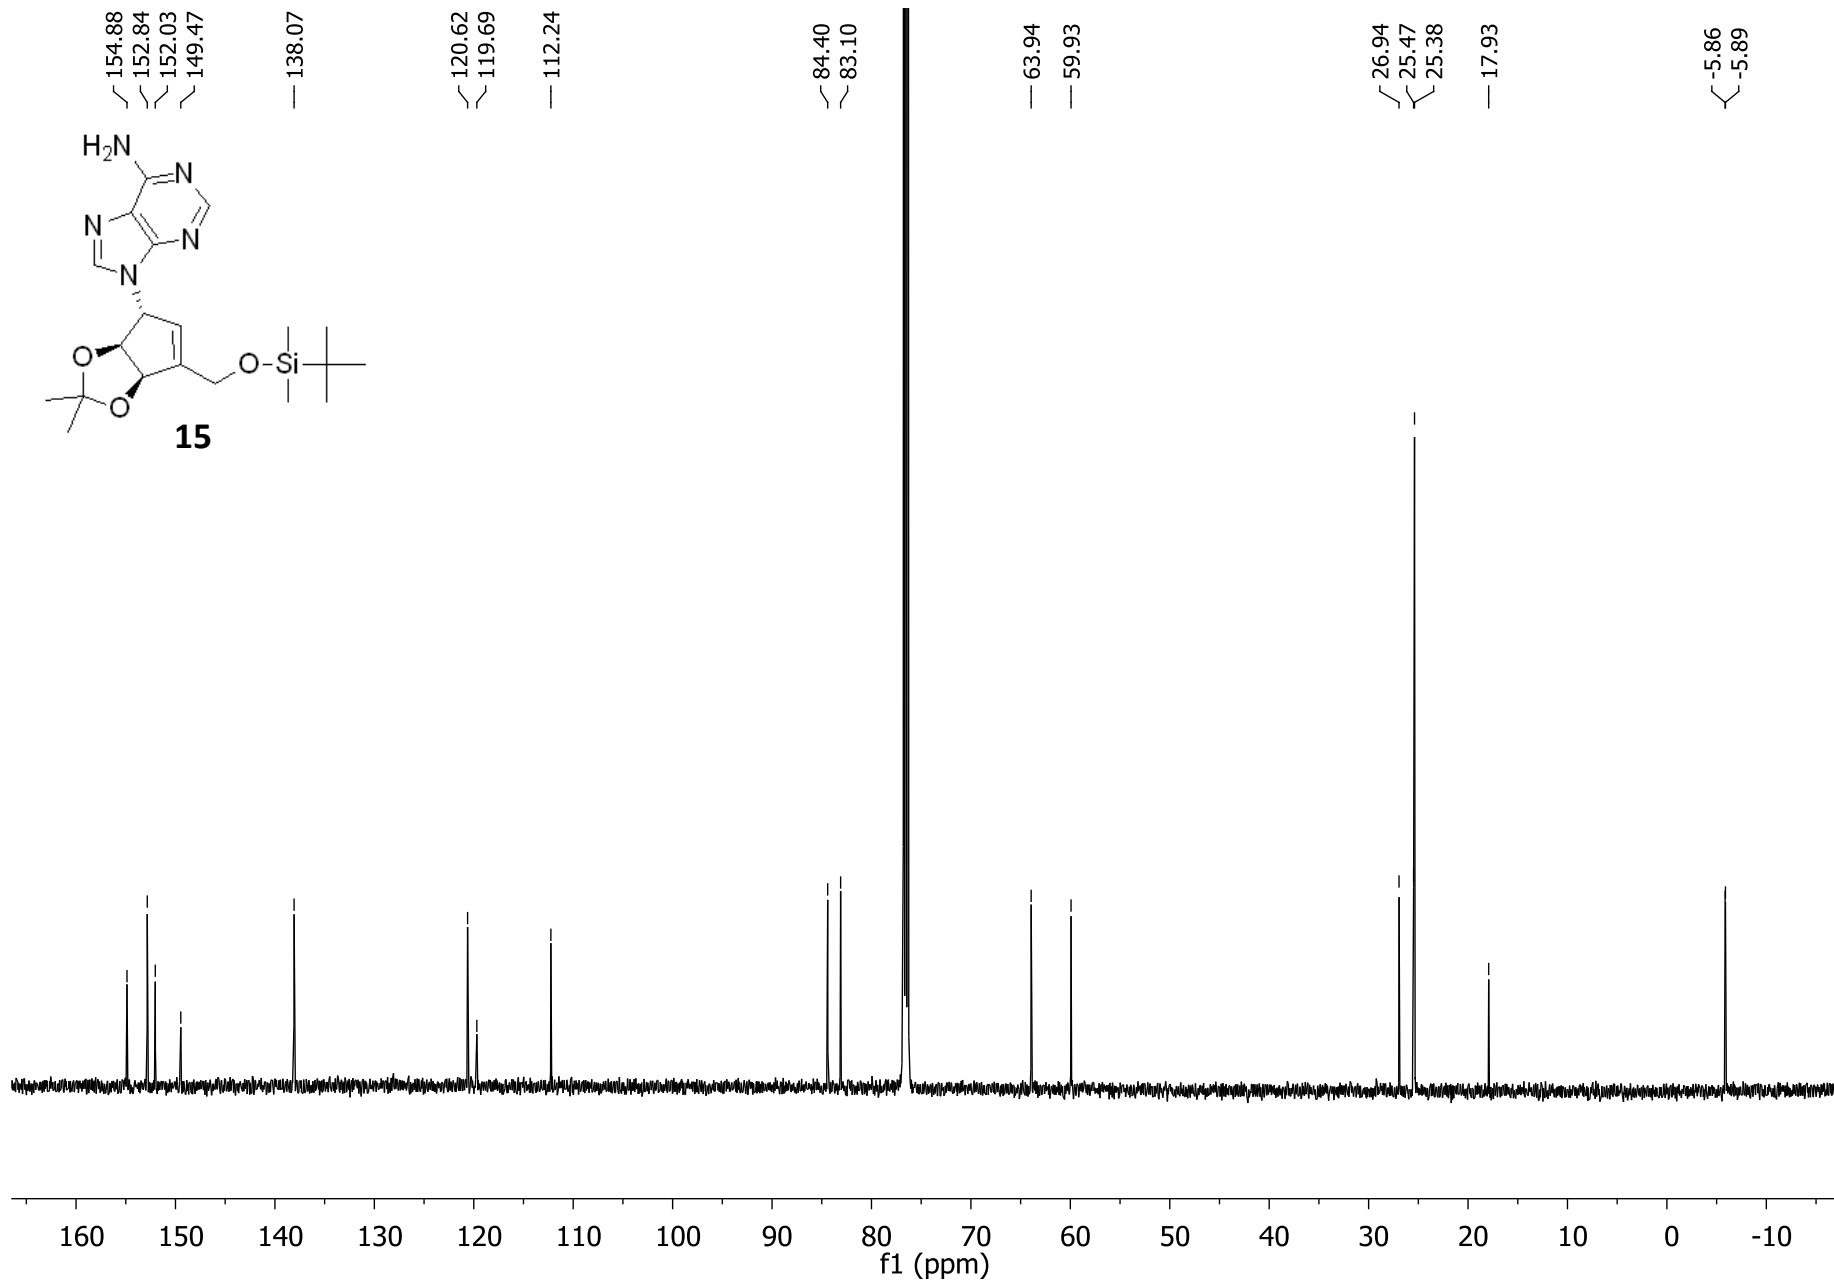

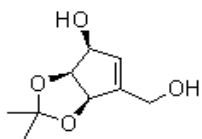

16

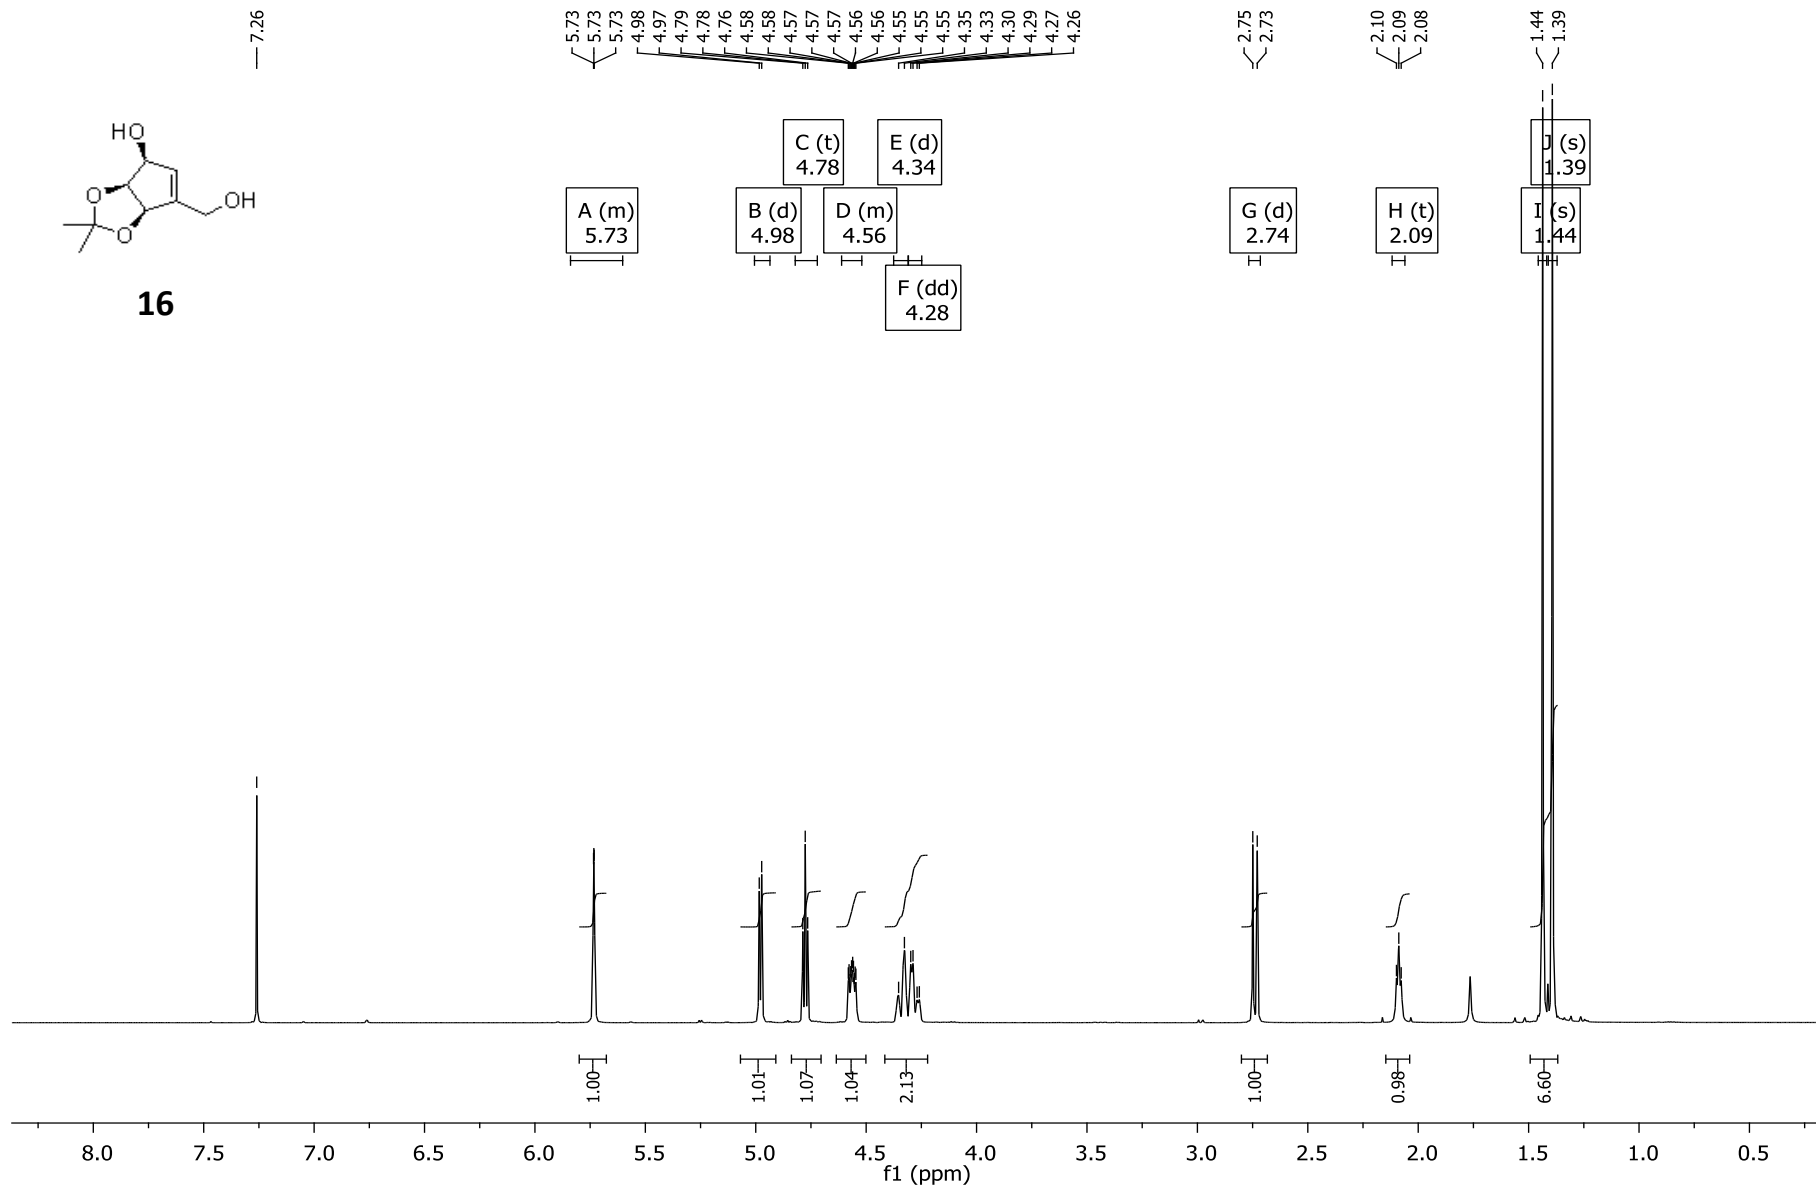

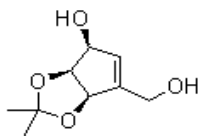

**16**

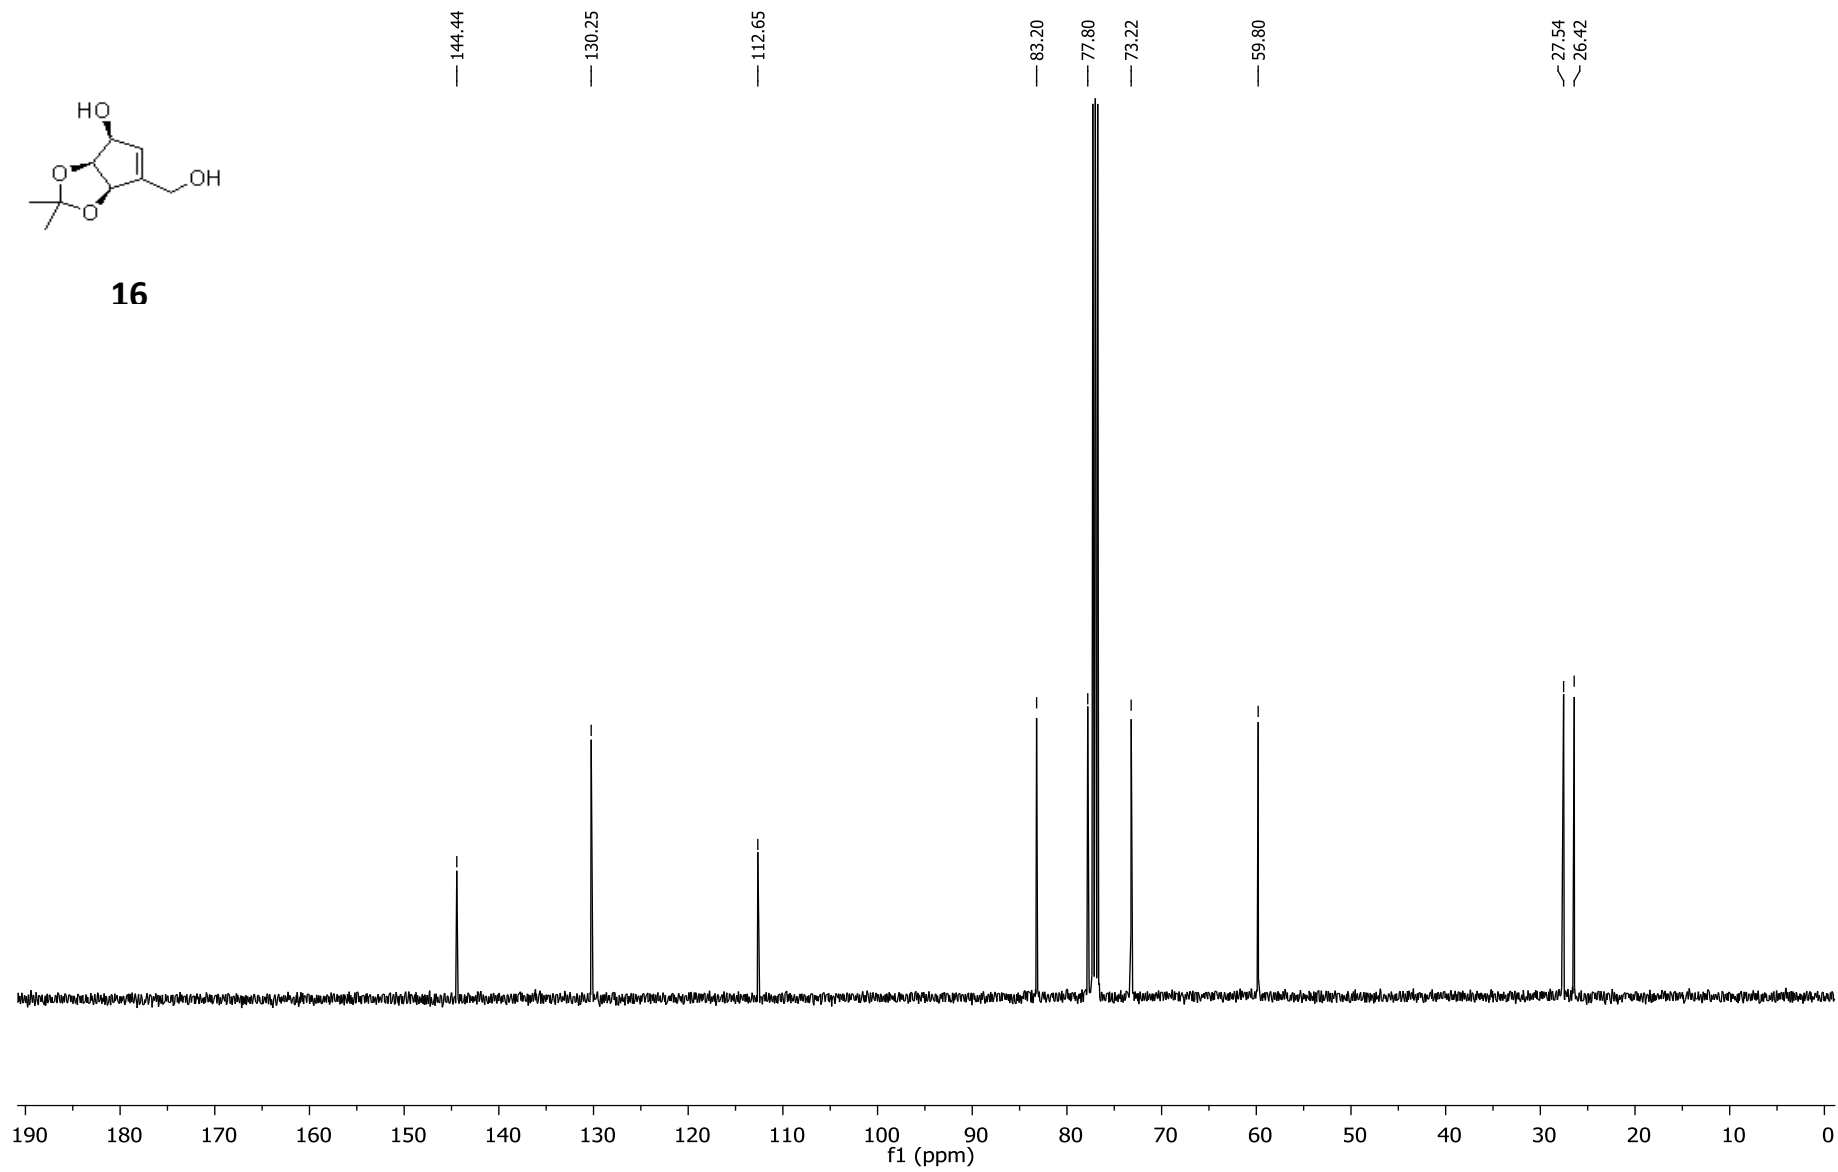

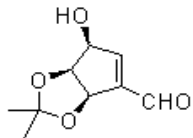

**17**

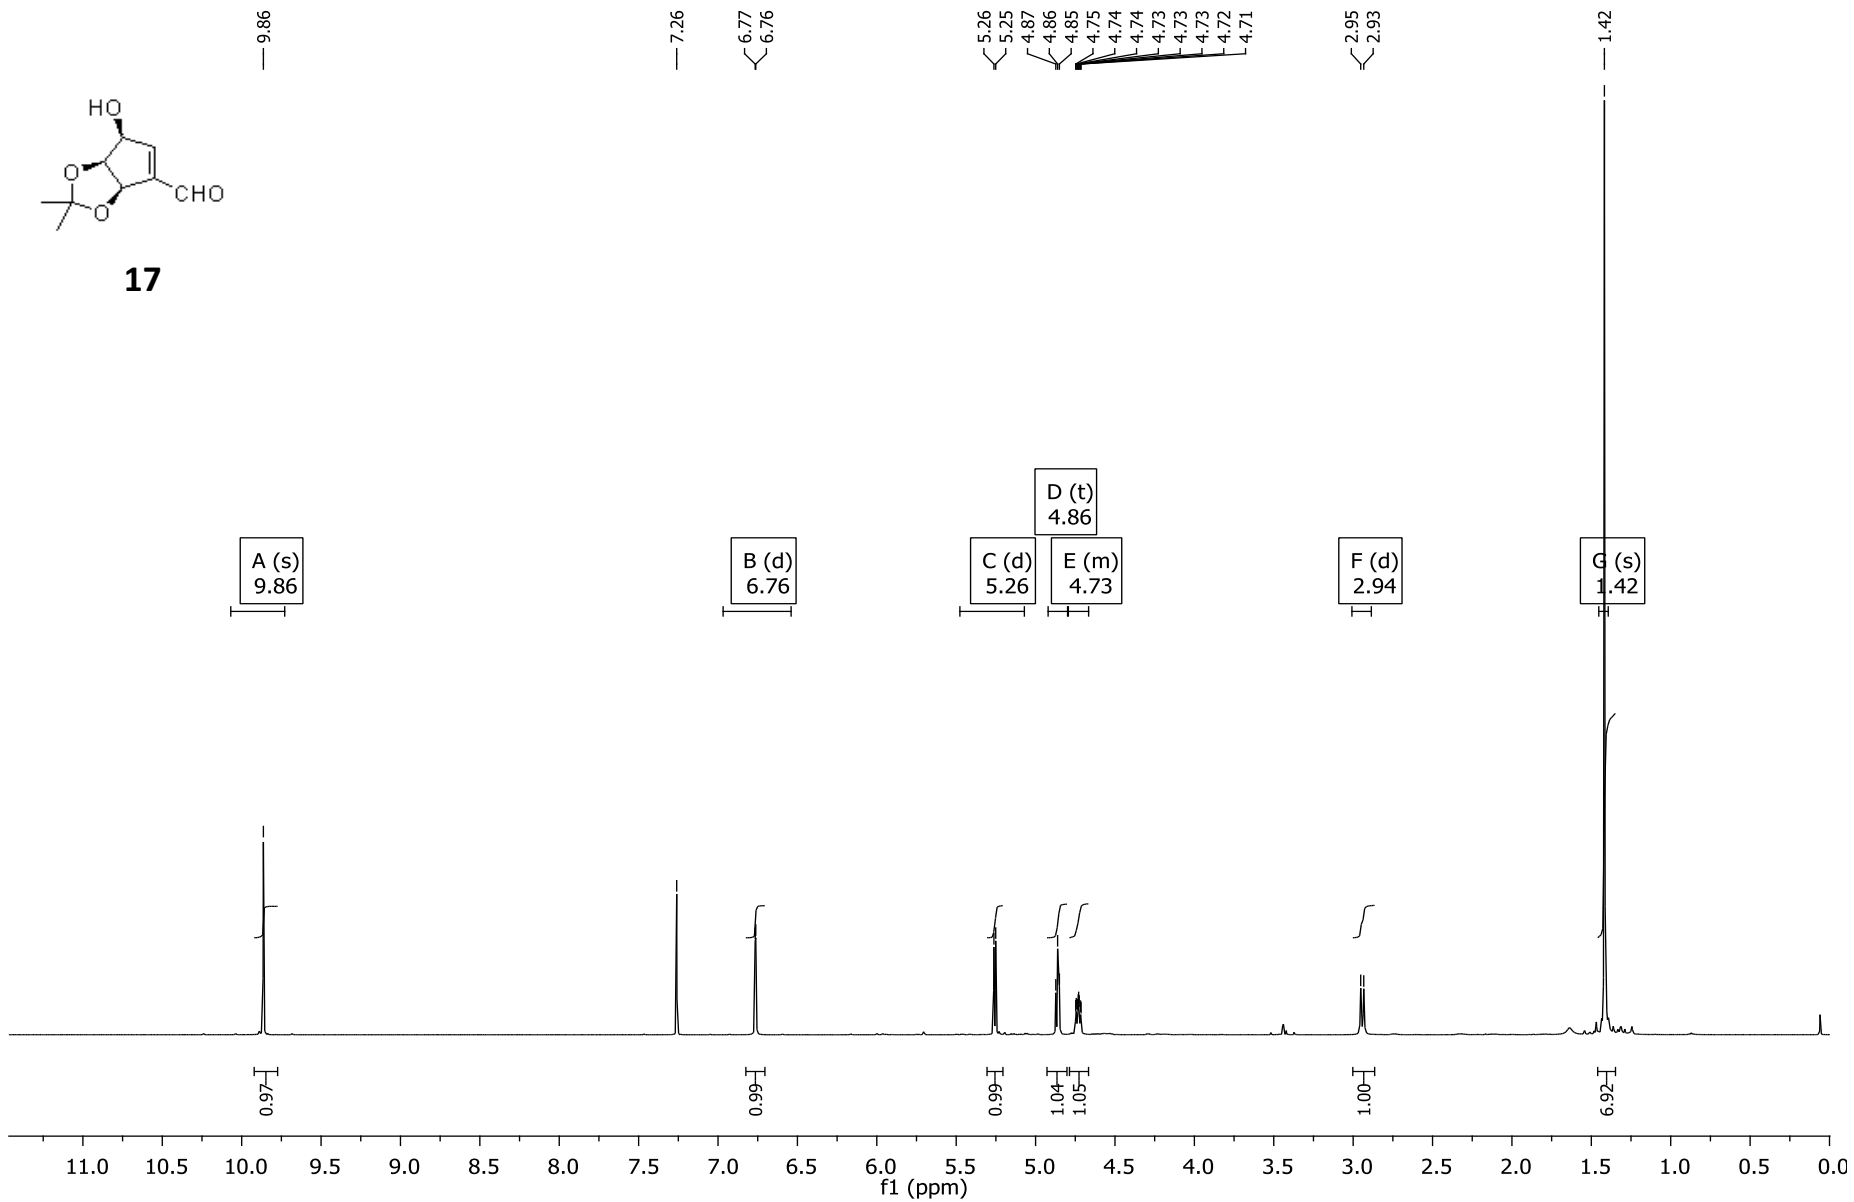

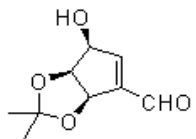

**17**

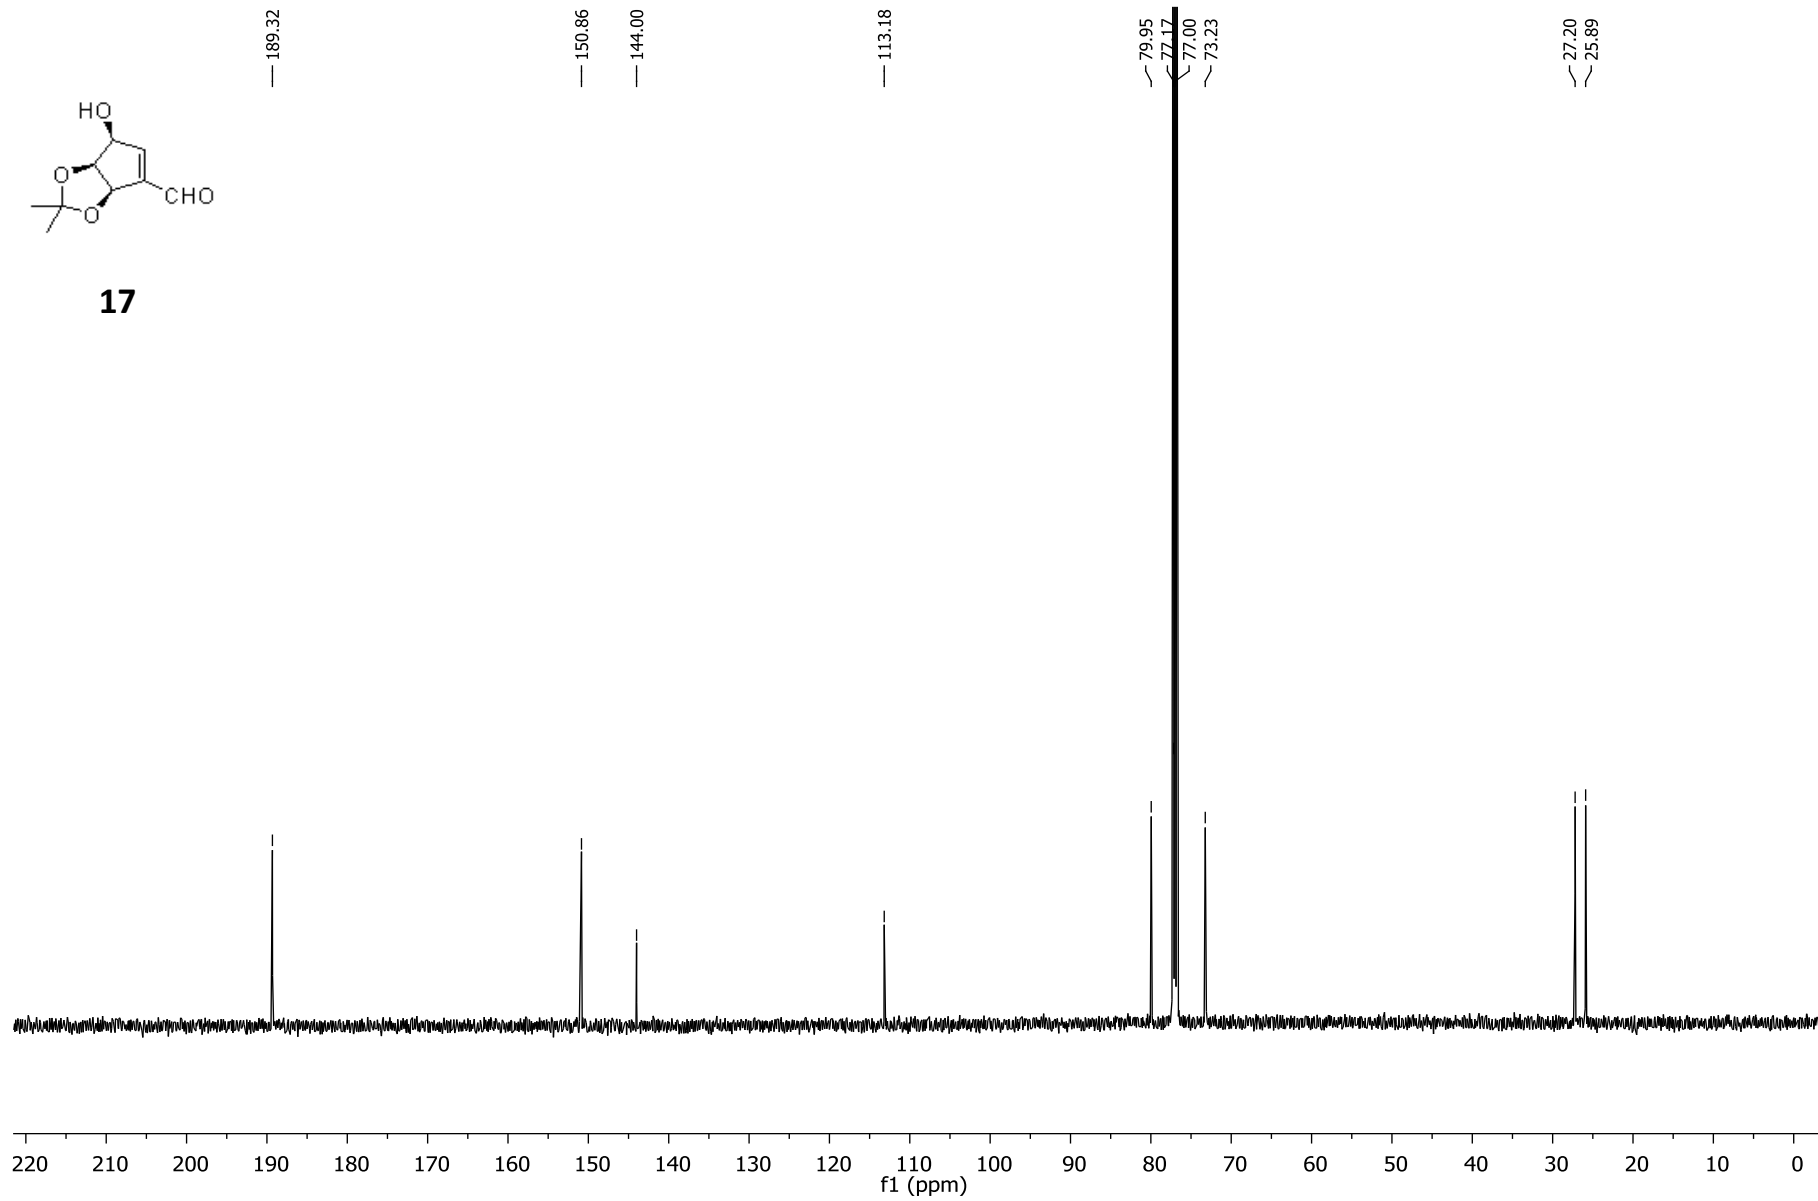

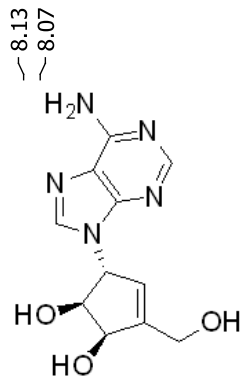

**Neplanocin A (NPA)**

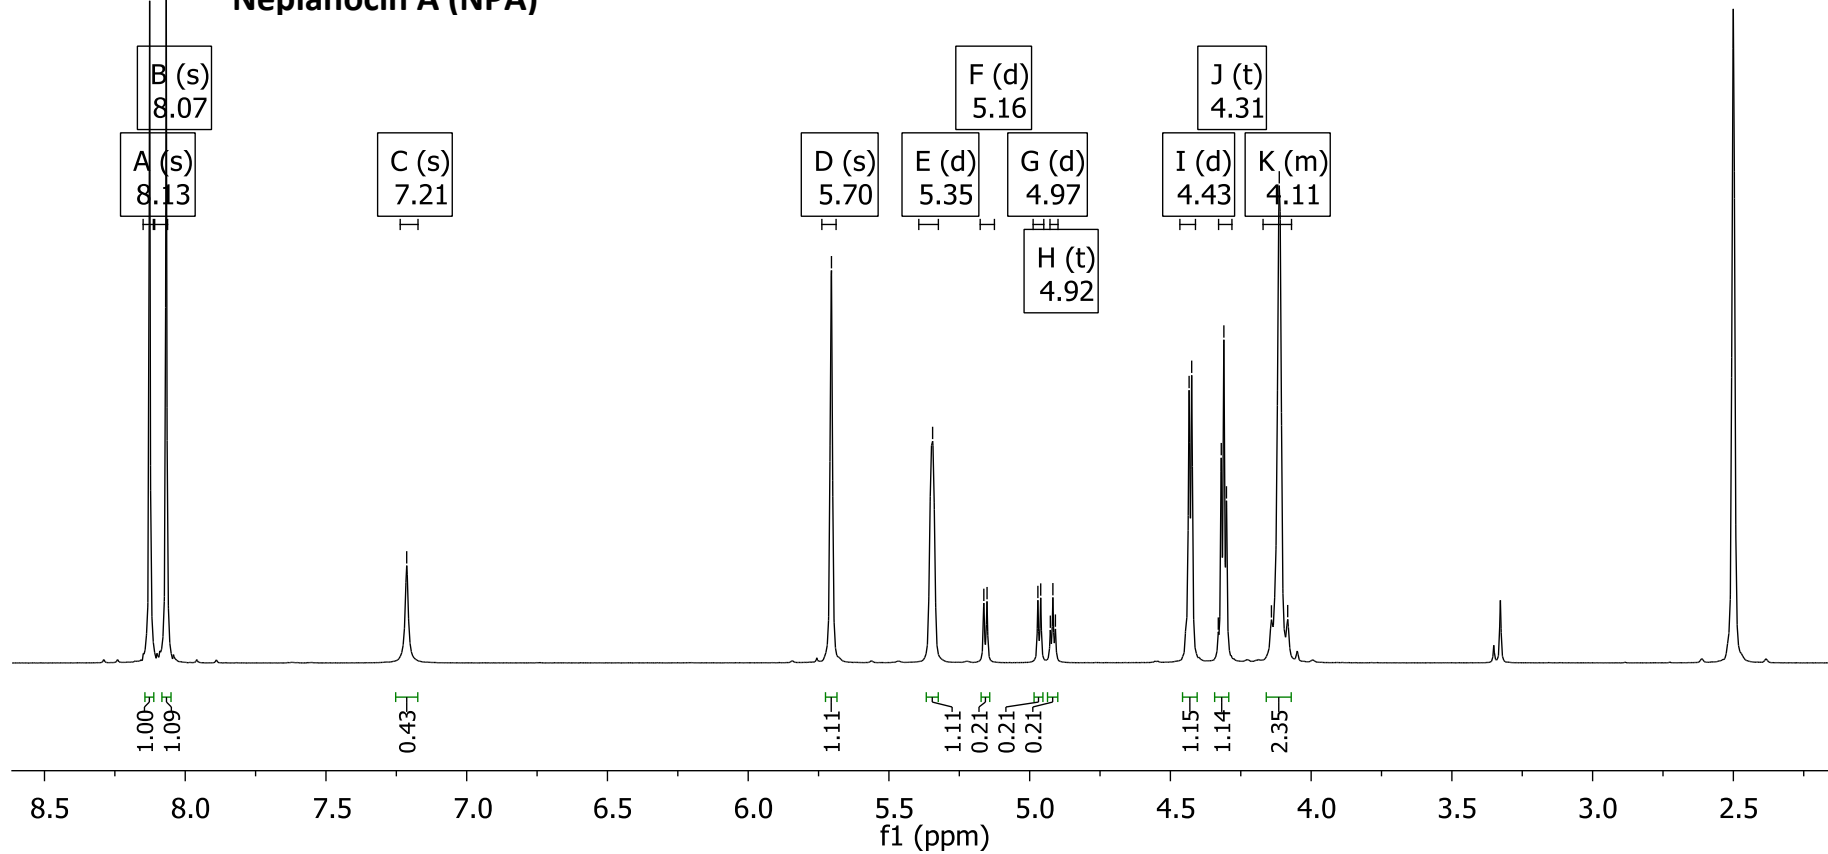

155.96  
155.90  
152.33  
150.02  
149.98  
149.66

139.54

123.48

119.13

76.45

72.12

64.19

58.45

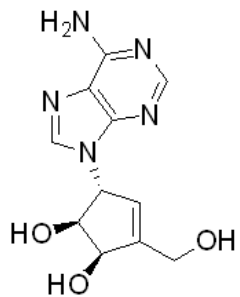

**Neplanocin A (NPA)**

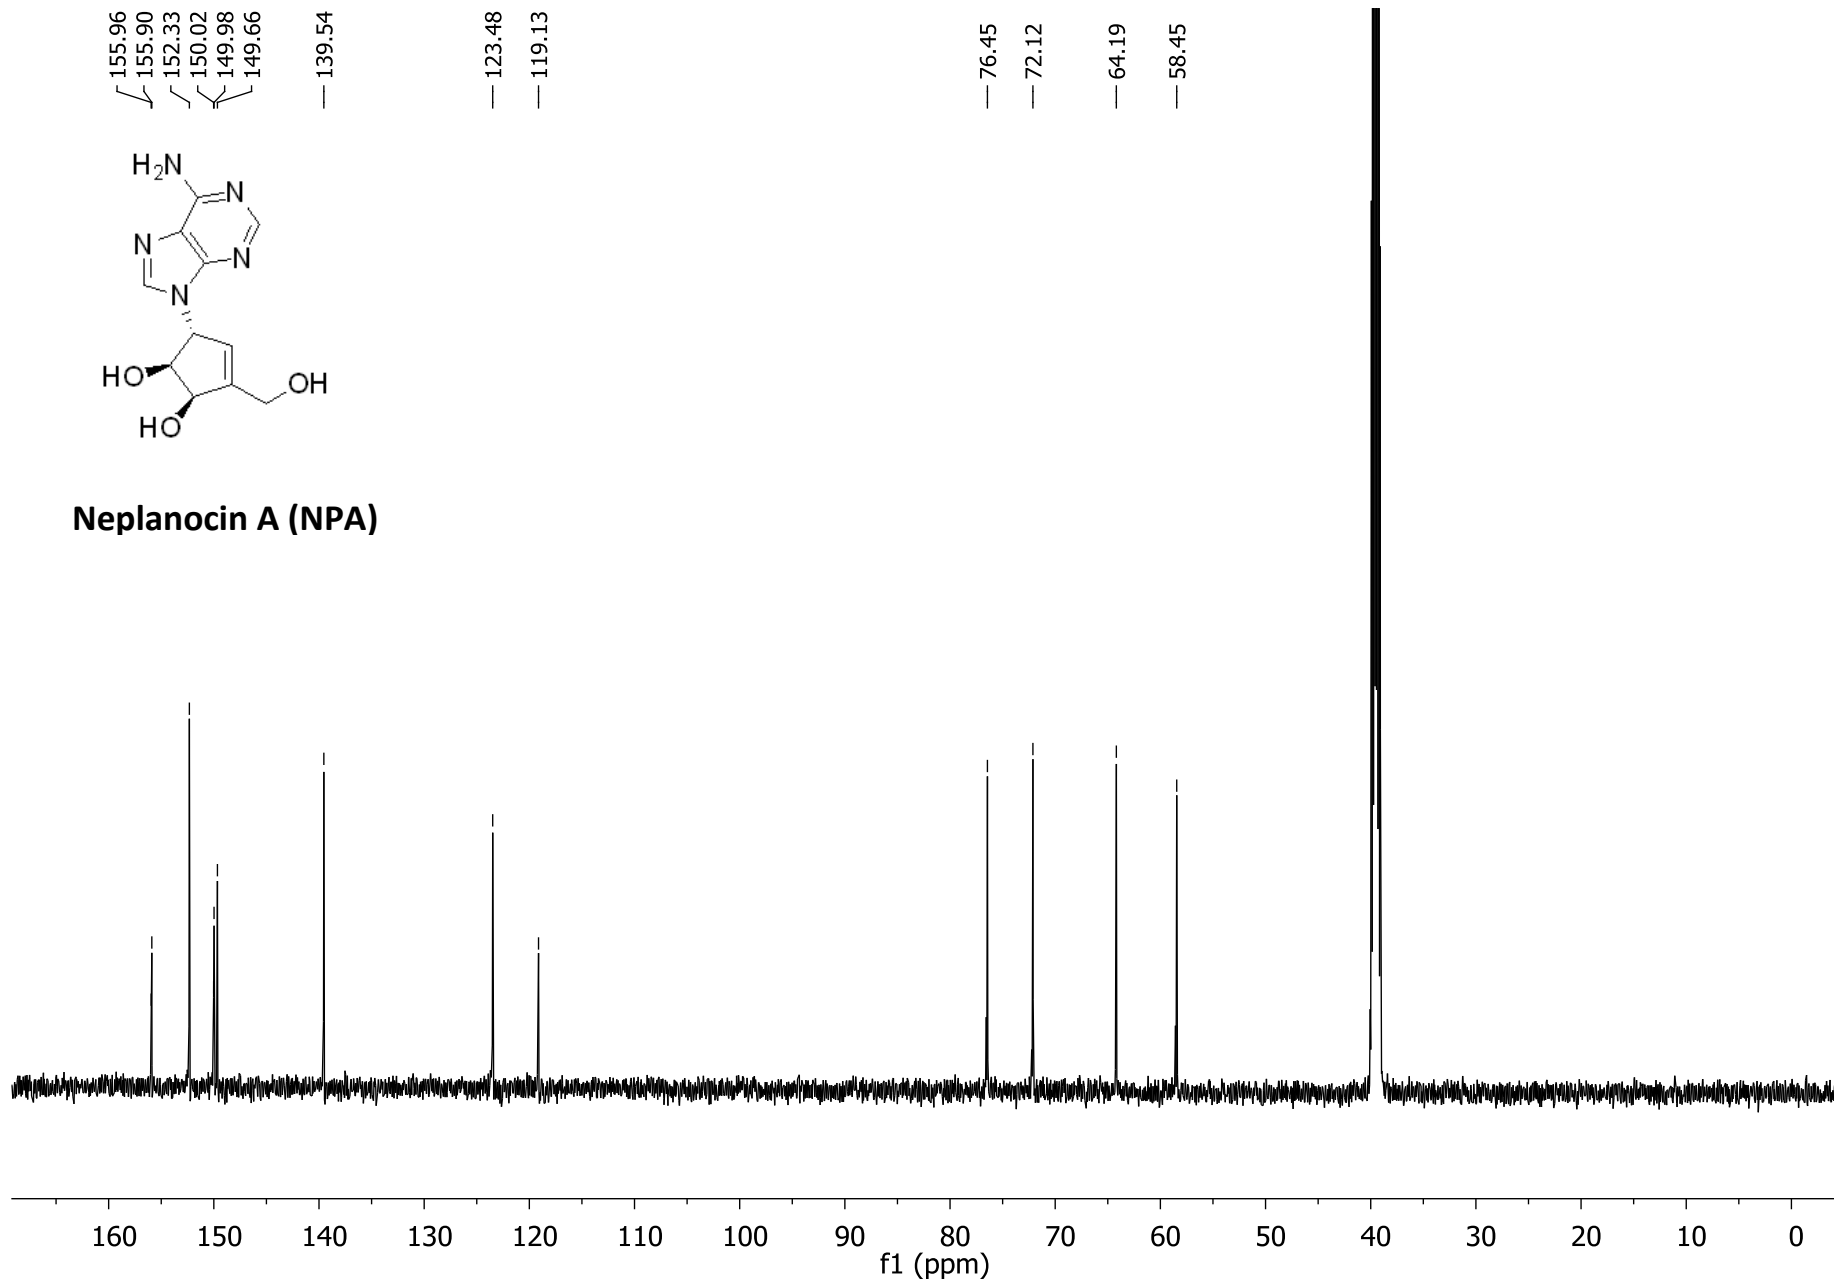

Supplement: RA-010-D0RA06394K-s001.pdf [file RA-010-D0RA06394K-s001.pdf]
